# Supplementary material for: Characterising metabolomic signatures of lipid-modifying therapies through drug target mendelian randomisation
Source: PubMed Central journal article supplement (PMC8906647; doi:10.1371/journal.pbio.3001547), 2022-02-25
Supplement: pbio.3001547.s017.pdf [file pbio.3001547.s017.pdf]

Genetically predicted effects of HMGCR (50kbs)

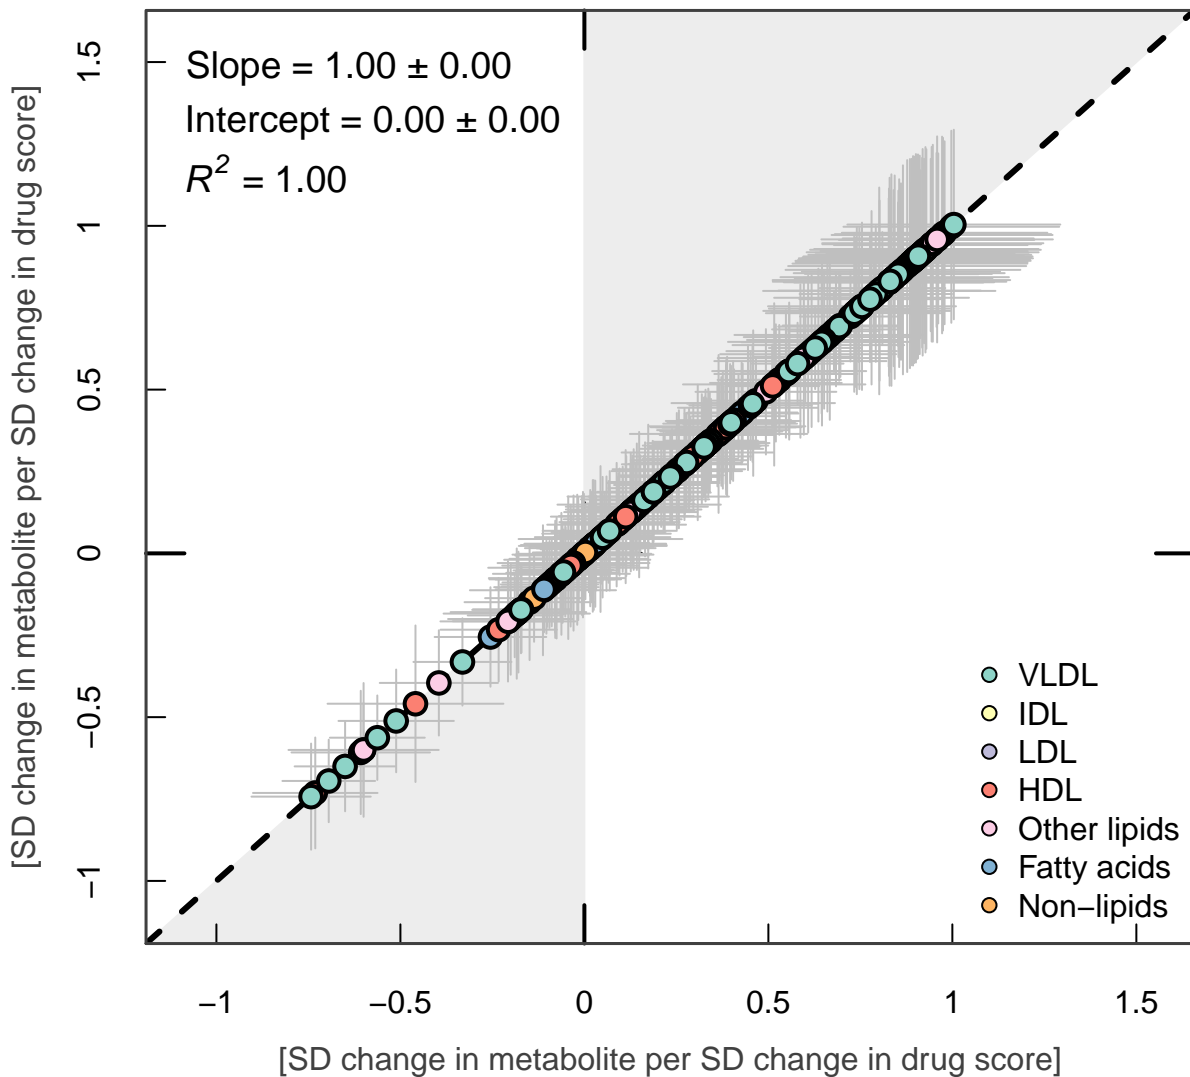

Genetically predicted effects of HMGCR (100kbs)
