# Supplementary material for: Characterising metabolomic signatures of lipid-modifying therapies through drug target mendelian randomisation
Source: PubMed Central journal article supplement (PMC8906647; doi:10.1371/journal.pbio.3001547), 2022-02-25

Genetically predicted effects of ANGPTL4 (50kbs)

[SD change in metabolite per SD change in drug score]

Slope =  $1.02 \pm 0.00$   
Intercept =  $0.00 \pm 0.00$   
 $R^2 = 1.00$

1.5  
1  
0.5  
0  
-0.5  
-1  
-1.5

-1.5 -1 -0.5 0 0.5 1 1.5

[SD change in metabolite per SD change in drug score]

Genetically predicted effects of ANGPTL4 (100kbs)

- VLDL
- IDL
- LDL
- HDL
- Other lipids
- Fatty acids
- Non-lipids

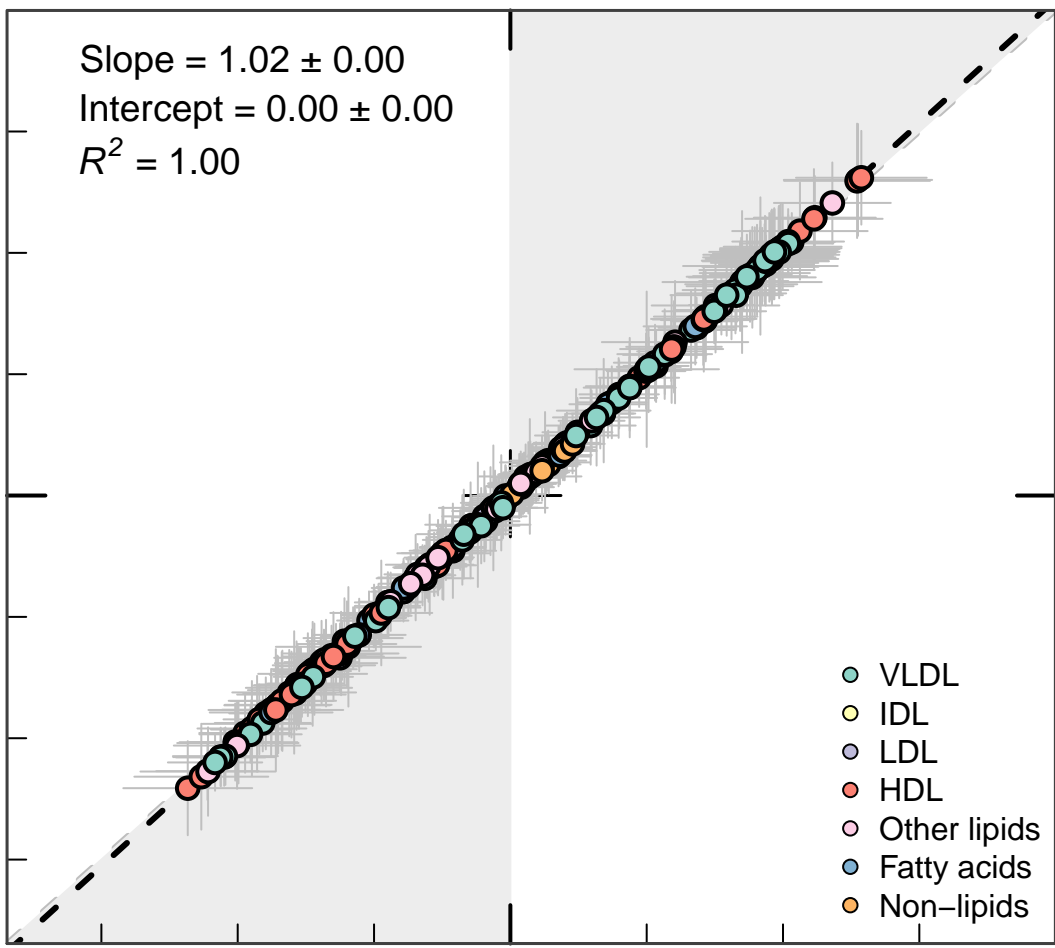

Supplement: pbio.3001547.s022.pdf [file pbio.3001547.s022.pdf]
