# Supplementary material for: Characterising metabolomic signatures of lipid-modifying therapies through drug target mendelian randomisation
Source: PubMed Central journal article supplement (PMC8906647; doi:10.1371/journal.pbio.3001547), 2022-02-25

Genetically predicted effects of ANGPTL3

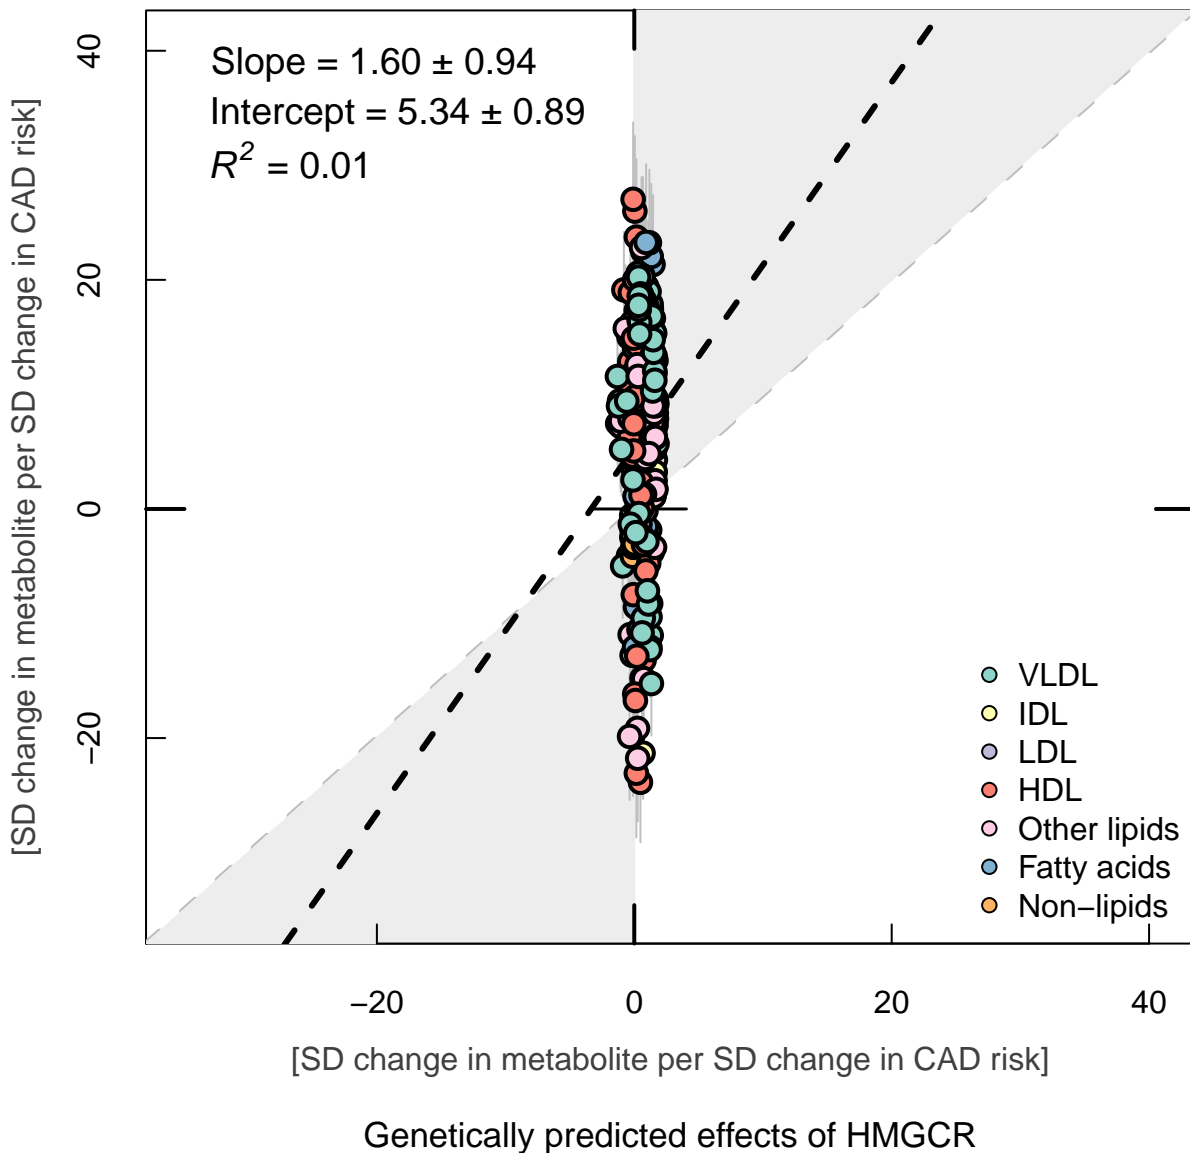

Supplement: pbio.3001547.s027.pdf [file pbio.3001547.s027.pdf]
