# Supplementary material for: Characterising metabolomic signatures of lipid-modifying therapies through drug target mendelian randomisation
Source: PLoS Biol. 2022 Feb 25;20(2):e3001547. doi: 10.1371/journal.pbio.3001547 (PMC8906647; doi:10.1371/journal.pbio.3001547)
Supplement: S16 Table — (XLSX) [file pbio.3001547.s016.xlsx]

## Sheet: Table S16 - CRP
S16 Table: Mendelian randomization estimates of drug targets on c-reactive protein levels
SE = standard error, LCI = lower confidence interval, UCI = upper confidence interval, P = p-value, FDR = false discovery rate
Drug target scores are oriented to be LDL cholesterol lowering (for HMGCR, PCSK9 & NPC1L1), triglyceride lowering (for ANGPTL3, ANGPTL4, APOC3 & LPL) and HDL cholesterol increasing (for CETP)
Gene	Outcome	Beta	SE	LCI	UCI	P
ANGPTL3	C-reactive protein	-0.216	0.089	-0.391	-0.041	0.016
ANGPTL4	C-reactive protein	-0.054	0.062	-0.176	0.067	0.382
APOC3	C-reactive protein	-0.059	0.032	-0.122	0.004	0.068
CETP	C-reactive protein	-0.022	0.017	-0.056	0.012	0.206
HMGCR	C-reactive protein	-0.117	0.08	-0.274	0.04	0.144
LPL	C-reactive protein	-0.072	0.037	-0.144	-0.001	0.047
NPC1L1	C-reactive protein	-0.059	0.135	-0.323	0.206	0.665
PCSK9	C-reactive protein	0.055	0.045	-0.033	0.144	0.22
