# Supplementary material for: Characterising metabolomic signatures of lipid-modifying therapies through drug target mendelian randomisation
Source: PLOS journal article supplement (doi:10.1371/journal.pbio.3001547), 2022-02-25
Supplement: S21 (10.1371/journal.pbio.3001547.s021) [file journal.pbio.3001547.s021]

Genetically predicted effects of ANGPTL3 (50kbs)

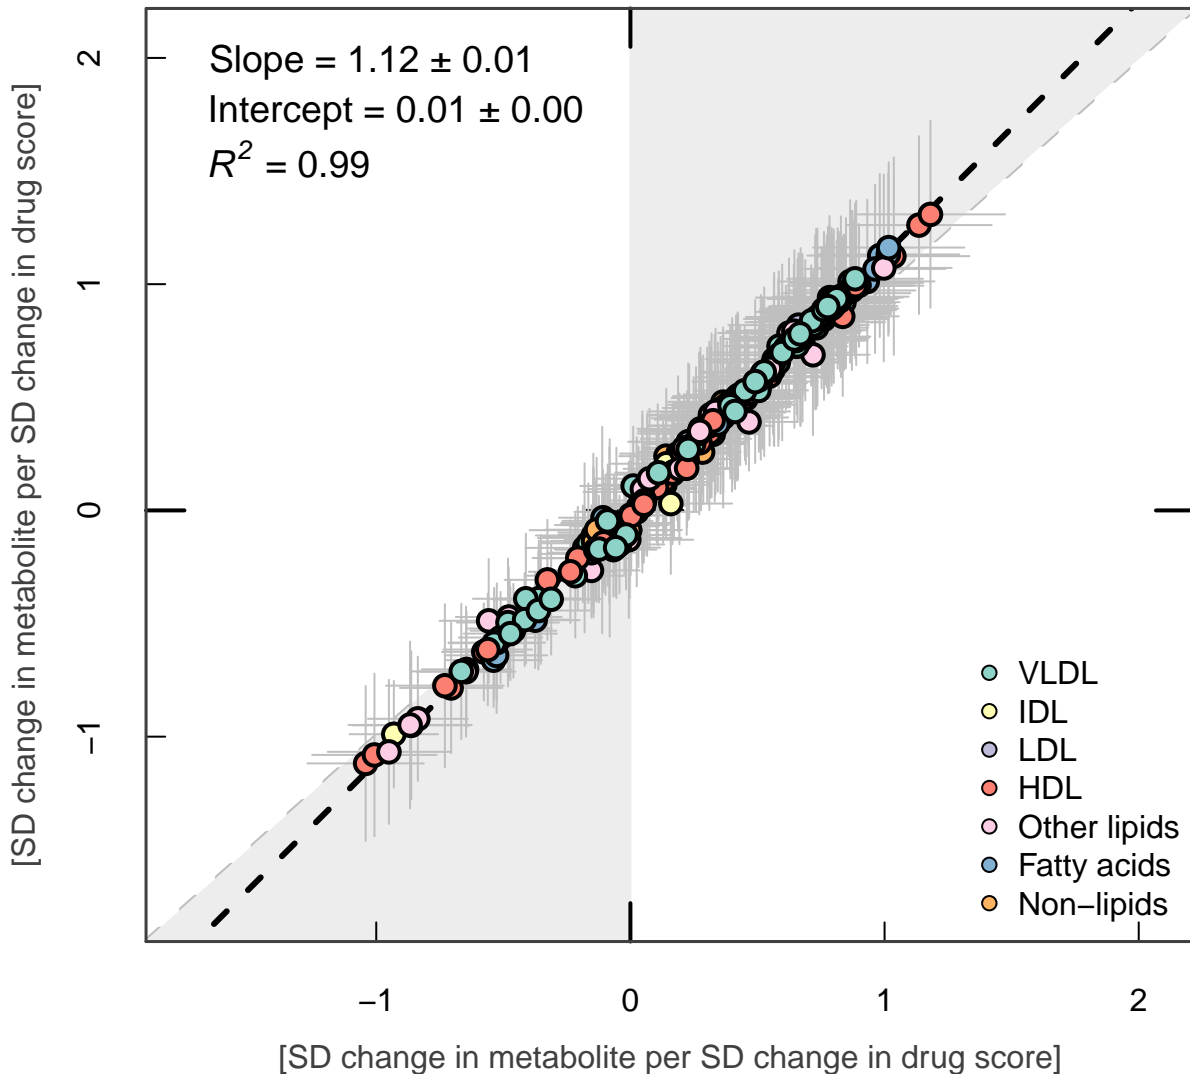

Genetically predicted effects of ANGPTL3 (100kbs)
